# Supplementary material
Source: ML conference proceedings conference paper supplement (https://openreview.net/forum?id=bKEqqxQ_w7)
Supplement: supplementary_material [file attachment]

---

# Solving Multi-Model MDPs by Coordinate Ascent and Dynamic Programming (Supplementary Material)

---

Xihong Su<sup>1</sup>

Marek Petrik<sup>1</sup>

<sup>1</sup>Department of Computer Science , University of New Hampshire , Durham, NH, USA

## A PROOF OF THEOREM 4.1

*Proof of Theorem 4.1.* For any time step  $\hat{t} \in \mathcal{T}$ , we can express the return as

$$\begin{aligned}
 \rho(\pi) &= \mathbb{E}^{\lambda, \pi, p^{\tilde{m}}, \mu} \left[ \sum_{t=1}^T r_t^{\tilde{m}}(\tilde{s}_t, \tilde{a}_t) \right] \\
 &= \mathbb{E}^{\lambda, \pi, p^{\tilde{m}}, \mu} \left[ \sum_{t=1}^{\hat{t}-1} r_t^{\tilde{m}}(\tilde{s}_t, \tilde{a}_t) \right] + \mathbb{E}^{\lambda, \pi, p^{\tilde{m}}, \mu} \left[ \sum_{t=\hat{t}}^T r_t^{\tilde{m}}(\tilde{s}_t, \tilde{a}_t) \right] \\
 &\stackrel{(a)}{=} C + \mathbb{E}^{\lambda, \pi, p^{\tilde{m}}, \mu} \left[ \mathbb{E} \left[ \sum_{t=\hat{t}}^T r_t^{\tilde{m}}(\tilde{s}_t, \tilde{a}_t) \mid \tilde{s}_{\hat{t}}, \tilde{m} \right] \right] \\
 &\stackrel{(b)}{=} C + \sum_{m \in \mathcal{M}, s_{\hat{t}} \in \mathcal{S}, a_{\hat{t}} \in \mathcal{A}} \mathbb{P}[\tilde{m} = m, \tilde{s}_{\hat{t}} = s_{\hat{t}}] \pi_{\hat{t}}^{\pi}(s_{\hat{t}}, a_{\hat{t}}) \cdot \mathbb{E}^{\lambda, \pi, p^{\tilde{m}}, \mu} \left[ \sum_{t=\hat{t}}^T r_t^{\tilde{m}}(\tilde{s}_t, \tilde{a}_t) \mid \tilde{s}_{\hat{t}} = s_{\hat{t}}, \tilde{a}_{\hat{t}} = a_{\hat{t}}, \tilde{m} = m \right] \\
 &\stackrel{(c)}{=} C + \sum_{m \in \mathcal{M}, s_{\hat{t}} \in \mathcal{S}, a_{\hat{t}} \in \mathcal{A}} b_{\hat{t}, m}^{\pi}(s_{\hat{t}}) \cdot \pi_{\hat{t}}^{\pi}(s_{\hat{t}}, a_{\hat{t}}) \cdot q_{\hat{t}, m}^{\pi}(s_{\hat{t}}, a_{\hat{t}}).
 \end{aligned}$$

Here, we use  $C = \mathbb{E}^{\lambda, \pi, p^{\tilde{m}}, \mu} \left[ \sum_{t=1}^{\hat{t}-1} r_t^{\tilde{m}}(\tilde{s}_t, \tilde{a}_t) \right]$  for brevity. The step (a) follows from the law of total expectation, the step (b) follows from the definition of conditional expectation, and the step (c) holds from the definitions of  $b$  and  $q$  in (3), (4), and (8).

Using the expression above, we can differentiate the return for each  $s \in \mathcal{S}$  and  $a \in \mathcal{A}$  as

$$\frac{\partial \rho(\pi)}{\partial \pi_{\hat{t}}^{\pi}(s, a)} = b_{\hat{t}, m}^{\pi}(s) \cdot q_{\hat{t}, m}^{\pi}(s, a),$$

which uses the fact that  $C$ ,  $b_{\hat{t}, m}^{\pi}$ , and  $q_{\hat{t}, m}^{\pi}$  are constant with respect to  $\pi_{\hat{t}}^{\pi}$ . The desired result then holds by substituting  $t$  for  $\hat{t}$ ,  $\hat{s}$  for  $s$ , and  $\hat{a}$  for  $a$ . □

## B PROOF OF THEOREM 5.1

*Proof of Theorem 5.1.* Assume some iteration  $n$ . The proof then follows directly from the construction of the policy  $\pi^n$  from  $\pi^{n-1}$ . By the construction in Eq. (13), we have that:

$$\rho(\pi_1^{n-1}, \dots, \pi_{t-1}^{n-1}, \pi_t^n, \pi_{t+1}^n, \dots, \pi_T^n) \geq \rho(\pi_1^{n-1}, \dots, \pi_{t-1}^{n-1}, \pi_t^{n-1}, \pi_{t+1}^n, \dots, \pi_T^n).$$

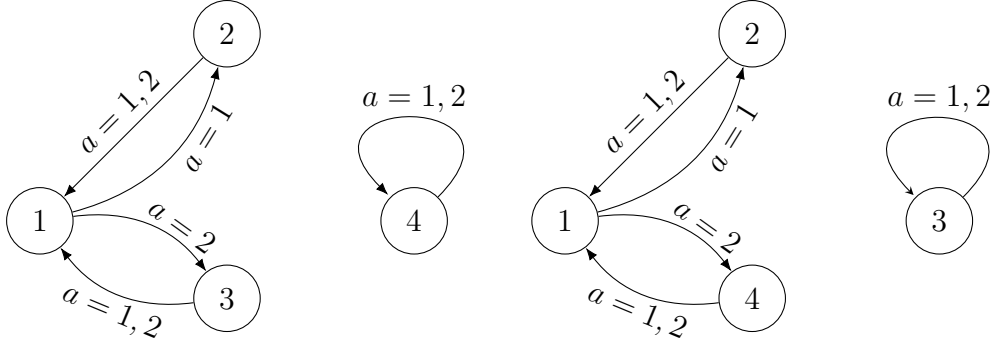

Figure 1: Left: model  $m_1$ , right: model  $m_2$

Note that the optimal form of the policy in Eq. (13) follows immediately from the standard first-order optimality criteria over a simplex (e.g. Ex. 3.1.2 in [Bertsekas, 2016]) and the fact that the function optimized in Eq. (13) is linear (Corollary 4.2). In particular, we have that

$$\pi_t^n \in \operatorname{argmax}_{\hat{\pi}_t \in \mathbb{R}^{\mathcal{S} \times \mathcal{A}}} \rho(\pi_1^{n-1}, \dots, \hat{\pi}_t, \dots, \pi_T^n)$$

if and only if for each  $s \in \mathcal{S}$  and  $a \in \mathcal{A}$

$$\frac{\partial \rho(\pi_1^{n-1}, \dots, \pi_t^n, \dots, \pi_T^n)}{\partial \pi_t(s, \pi_t^n(s))} \geq \frac{\partial \rho(\pi_1^{n-1}, \dots, \pi_t^n, \dots, \pi_T^n)}{\partial \pi_t(s, a)}.$$

Intuitively, this means that the optimal policy  $\pi_t^n$  must choose actions that have the *maximum* gradient for each state. The optimization in Eq. (13) then follows by algebraic manipulation from Theorem 4.1.  $\square$

## C PROOF OF THEOREM 5.3

*Proof of Theorem 5.3.* Consider the MMDP illustrated in Figure 1.

First, we describe the time steps, states, rewards, and actions for this MMDP. This MMDP has three time steps, four states  $\mathcal{S} = \{1, 2, 3, 4\}$ , two actions  $\mathcal{A} = \{1, 2\}$ , and two models  $\mathcal{M} = \{1, 2\}$ . The model weight for  $m_1$  is  $\lambda$ , then the model weight for  $m_2$  is  $1 - \lambda$ . State 1 is the only initial state. In model  $m_1$ , the only non-zero reward 2 is received upon reaching state 2. The agent takes action 1, which leads to a transition to state 2 with a probability of 1. The agent takes action 2, which leads to a transition to state 3 with probability 1. The agent takes action 1 or 2 in state 2, which leads to a transition to state 1 with probability 1. The agent takes action 1 or 2 in state 3, which leads to a transition to state 1 with probability 1. The agent takes action 1 or 2 in state 4, which leads to a transition to state 4 with probability 1.

In model  $m_2$ , the agent receives rewards 3 upon reaching state 4 and receives rewards 2 upon reaching state 2. The agent takes action 1, which leads to a transition to state 2 with probability 1. The agent takes action 2, which leads to a transition to state 4 with probability 1. The agent takes action 1 or 2 in state 2, which leads to a transition to state 1 with probability 1. The agent takes action 1 or 2 in state 4, which leads to a transition to state 1 with probability 1. The agent takes action 1 or 2 in state 3, which leads to a transition to state 3 with probability 1.

Now, let us analyze the regret of this MMDP. The optimal policy of the above example is a history-dependent policy. That is, to take action 2 at time step 1. At time step 2, the agent takes action 1 or 2, which leads to a transition back to state 1. From time step 3, if the agent is in model  $m_1$ , then take action 1; if the agent is in model  $m_2$ , then take action 2.

Next, let us analyze the regret of a Markov policy for the MMDP.  $S_t$  represents a state at time step  $t$ . State 1 has two options: select action 1 or select action 2. If action 1 is selected, this will give a regret value of 0 in model 1 and a regret value of 1 in model 2. If action 2 is selected, this will give a regret value of 2 in model 1 and a regret value of 0 in model 2. Therefore, at time step 1, the total regret is  $2\lambda$  or  $1(1 - \lambda)$ . At time step 2, the agent takes action 1 or 2 in state  $S_2(1, 3$  or  $4)$ , which leads to a transition back to state 1, and gets zero rewards and zero regrets. Then repeat the procedure. At time step 3, the agent can take action 1 or action 2 in state 1 again. For  $T = 3$ , the trajectory of

a Markov policy can be  $(S_1 = 1, A_1 = 1, S_2, A_2, S_3 = 1, A_3 = 1)$ ,  $(S_1 = 1, A_1 = 1, S_2, A_2, S_3 = 1, A_3 = 0)$ ,  $(S_1 = 1, A_1 = 0, S_2, A_2, S_3 = 1, A_3 = 1)$ , or  $(S_1 = 1, A_1 = 0, S_2, A_2, S_3 = 1, A_3 = 0)$ . The accumulated regret can be  $2\lambda + 1(1 - \lambda)$ ,  $2\lambda + 2\lambda$ ,  $1(1 - \lambda) + 1(1 - \lambda)$ . That is, the regret is increased by  $1(1 - \lambda)$  or  $2\lambda$  for every two time steps.

$$R_t(\pi) \geq \frac{\min\{2\lambda, 1 - \lambda\}}{2} \cdot t$$

Let  $c = \frac{\min\{2\lambda, 1 - \lambda\}}{2}$ ,  $t' \geq 2$ , then we always have

$$R_t(\pi) \geq c \cdot t \quad \text{for all } t \geq t'$$

No matter which Markovian policy the agent follows, the accumulated regret will be linear with respect to  $t$ . Therefore, for this MMDP, there exists no Markovian policy that achieves sub-linear regret.  $\square$

## D ADAPTED MIXTS ALGORITHM

The adapted MixTS algorithm is formalized in Algorithm 1.  $P_0$  is the prior of MDPs and follows the uniform distribution. At the beginning of episode  $t$ , sample a MDP  $M_t$  from the posterior  $P_t$  and compute a policy  $\pi_t$  that maximizes the value of  $M_t$ . Then at each time step  $h$ , take the action  $A_h$  based on the policy  $\pi_t$  and obtain reward  $Y_h$ . For each MDP  $m \in \mathcal{M}$ , update its posterior based on the received rewards.

---

### Algorithm 1 Adapted MixTS

---

**Input:** The prior of MDPs  $P_0$

- 1: Initialize  $P_1 \leftarrow P_0$
  - 2: **for** episodes  $t = 1, \dots, \mathcal{N}$  **do**
  - 3:   Sample  $M_t \sim P_t$
  - 4:   Compute  $\pi_t = \pi^{M_t}$
  - 5:   **for** timesteps  $h = 1, \dots, H$  **do**
  - 6:     Select  $A_h \leftarrow \pi_t(S_h)$
  - 7:     Observe reward  $Y_h$
  - 8:     Update  $P_{t+1}(m) \propto P_t(m)P(Y_h | A_h; m), \forall m \in \mathcal{M}$
  - 9:   **end for**
  - 10: **end for**
- 

## E NUMERICAL RESULTS: DETAILS

### E.1 DOMAIN DETAILS

The CSV files of all domains are available at <https://github.com/suxh2019/CADP>. “initial.csv” specifies the initial distribution over states. “parameters.csv” contains the discount factor. “training.csv” and “test.csv” have the following columns: “idstatefrom”, “idaction”, “idstateto”, “idoutcome”, “probability”, and “reward”. Each row entry specifies a transition from “idstatefrom” after taking an action “idaction” to state “idstateto” with the associated “probability” and “reward” in model “idoutcome”. A policy is computed from the “training.csv”, and the policy is evaluated on the “test.csv”. The models are identified with integer values  $0, \dots, M - 1$ , and each model is defined on the same state space and the action space. The states are identified with integer values  $0, \dots, S - 1$ , and the actions are identified with integer values  $0, \dots, A - 1$ . Note that the number of actions taken in each state  $s$  is less or equal to  $A$ . Each MDP model has its unique reward functions and transition probability functions.

### E.2 ADDITIONAL SIMULATION RESULTS

Table 1 shows mean returns of algorithms on five domains at different time steps. Table 2 shows the standard deviations of returns of algorithms on five domains at different time steps. The algorithm “Oracle” knows the true model and its standard deviation summarizes the variability of MDP models in an MMDP. The standard deviations of other algorithms include both the variability of MDP models and the variability of a policy in a MDP model. Table 3 shows runtimes of algorithms on five domains at different time steps. *CADP* performs best with some runtime penalty.

Table 1: Mean Returns  $\rho(\pi)$  on the Test Set of Policies  $\pi$  Computed by Each Algorithm.

| Algorithm   | RS         |            | POP         |             | POPS         |              | INV        |            | HIV          |              |
|-------------|------------|------------|-------------|-------------|--------------|--------------|------------|------------|--------------|--------------|
|             | T = 100    | T =150     | T = 100     | T =150      | T = 100      | T =150       | T = 100    | T =150     | T = 5        | T =20        |
| <b>CADP</b> | <b>207</b> | <b>207</b> | <b>-368</b> | <b>-368</b> | <b>-1082</b> | <b>-1082</b> | 348        | <b>350</b> | <b>33348</b> | <b>42566</b> |
| WSU         | 206        | 206        | -551        | -551        | -1934        | -1932        | 347        | 349        | <b>33348</b> | 42564        |
| MVP         | 204        | 204        | -717        | -717        | -2178        | -2179        | 348        | <b>350</b> | <b>33348</b> | 42564        |
| Mirror      | 183        | 183        | -1601       | -1600       | -3810        | -3800        | 343        | 345        | <b>33348</b> | <b>42566</b> |
| Gradient    | 206        | 206        | -551        | -551        | -1934        | -1932        | 347        | 349        | <b>33348</b> | 42564        |
| MixTS       | 172        | 176        | -1961       | -1711       | -3042        | -3016        | <b>350</b> | <b>350</b> | 293          | -1026        |
| QMDP        | 201        | 183        | -           | -           | -            | -            | -          | -          | 30705        | 39626        |
| POMCP       | 54         | 64         | -           | -           | -            | -            | -          | -          | 25794        | 30910        |
| Oracle      | 213        | 213        | -172        | -172        | -894         | -894         | 358        | 360        | 40159        | 53856        |

Table 2: Standard Deviation of Returns of Algorithms on Five Domains.

| Algorithm   | RS        |           | POP         |             | POPS        |             | INV       |           | HIV         |              |
|-------------|-----------|-----------|-------------|-------------|-------------|-------------|-----------|-----------|-------------|--------------|
|             | T = 100   | T =150    | T = 100     | T =150      | T = 100     | T =150      | T = 100   | T =150    | T = 5       | T =20        |
| <b>CADP</b> | 98        | 98        | <b>1095</b> | <b>1095</b> | <b>2007</b> | <b>2007</b> | <b>51</b> | <b>51</b> | 9342        | <b>11309</b> |
| MVP         | 90        | 90        | 2046        | 2046        | 3619        | 3620        | 52        | 52        | <b>7729</b> | 12234        |
| WSU         | 100       | 100       | 1364        | 1364        | 3147        | 3146        | 53        | 53        | <b>7729</b> | 12234        |
| Mirror      | <b>70</b> | <b>70</b> | 2081        | 2081        | 4534        | 4530        | 57        | 58        | <b>7729</b> | 12237        |
| Gradient    | 100       | 100       | 1364        | 1364        | 3147        | 3146        | 53        | 53        | <b>7729</b> | 12234        |
| MixTS       | 226       | 231       | 4436        | 4187        | 5507        | 5542        | 58        | 58        | 23689       | 27792        |
| QMDP        | 193       | 204       | -           | -           | -           | -           | -         | -         | 42987       | 61596        |
| POMCP       | 66        | 118       | -           | -           | -           | -           | -         | -         | 42208       | 57772        |
| Oracle      | 95        | 95        | 1045        | 1045        | 1889        | 1889        | 51        | 51        | 9029        | 14796        |

Table 3: Run-times of Algorithms on Five Domains in Minutes.

| Algorithm   | RS          |             | POP          |              | POPS        |             | INV         |             | HIV           |               |
|-------------|-------------|-------------|--------------|--------------|-------------|-------------|-------------|-------------|---------------|---------------|
|             | T = 100     | T =150      | T = 100      | T =150       | T = 100     | T =150      | T = 100     | T =150      | T = 50        | T =100        |
| MVP         | <b>0.05</b> | <b>0.05</b> | <b>27.68</b> | <b>27.51</b> | <b>0.36</b> | <b>0.36</b> | <b>0.22</b> | <b>0.22</b> | <b>0.0003</b> | <b>0.0003</b> |
| WSU         | 0.12        | 0.14        | 40.02        | 45.39        | 1.53        | 2.37        | 0.67        | 0.89        | 0.0033        | 0.0048        |
| <b>CADP</b> | 0.52        | 1.13        | 124.39       | 173.04       | 12.12       | 16.21       | 1.53        | 2.22        | 0.0109        | 0.0164        |
| Mirror      | 1.86        | 3.11        | 113.08       | 158.06       | 8.08        | 11.90       | 35.90       | 53.6        | 0.0221        | 0.0330        |
| Gradient    | 0.51        | 0.74        | 56.82        | 69.32        | 2.97        | 4.31        | 1.12        | 1.44        | 0.0083        | 0.0123        |
| MixTS       | 0.09        | 0.12        | 32.08        | 35.36        | 0.80        | 1.03        | 0.47        | 0.59        | 0.0033        | 0.0047        |
| QMDP        | 712         | 712         | -            | -            | -           | -           | -           | -           | 0.7071        | 0.7071        |
| POMCP       | 68          | 68          | -            | -            | -           | -           | -           | -           | 0.2066        | 0.2066        |
